# Supplementary material for: Highly selective absorption of polychloromethanes in perhydroxylated cucurbit[6]uril-based supramolecular assemblies
Source: Royal Society of Chemistry journal article supplement (doi:10.1039/c7nj03446f), 2017-12-01
Supplement: c7nj03446f1.pdf [file c7nj03446f1.pdf]

## Supplementary Information

# Highly Selective Absorption of Polychloromethanes in Perhydroxylated Cucurbit[6]uril-based Supramolecular Assemblies

Xi Xia,<sup>a</sup> Kai Chen,<sup>\*b</sup> Yuqing Yao,<sup>a</sup> Chunyan Shan,<sup>a</sup> Zhu Tao,<sup>a</sup> Yunqian Zhang,<sup>\*a</sup> Qingdi Zhou<sup>c</sup> and Gang Wei<sup>\*d</sup>

[a] Prof. Yun-Qian Zhang, Prof. Zhu Tao, Mis. Xi Xia, Mr. Yu Qing Yao, Mis Chunyan Shan

Key Laboratory of Macrocyclic and Supramolecular Chemistry of Guizhou Province, Guizhou University, Guiyang 550025, China; E-mail: sci.yqzhang@gzu.edu.cn (Yun-Qian Zhang)

[b] Collaborative Innovation Center of Atmospheric Environment and Equipment Technology,

Jiangsu Key Laboratory of Atmospheric Environment Monitoring and Pollution Control, School of Environmental Science and Engineering, Nanjing University of Information Science &

Technology, Nanjing 210044. E-mail: kaichen85@nuist.edu.cn or catqchen@163.com (Kai Chen)

[c] Prof. Qingdi Zhou, School of Chemistry, the University of Sydney, NSW2006, Australia.

[d] Prof. Gang Wei, CSIRO Manufacturing Flagship, PO Box 218, Lindfield, NSW 2070, Australia. E-mail: Gang.We@csiro.au

## ■ EXPERIMENTAL SECTION

### Vapour absorption studies for A and B

The required solid compounds (**A** or **B**; 0.5 – 1.0 g) contained in a tared open glass phial was added to a sealed glass vessel which was then evacuated with the aid of a vacuum pump. Pumping was continued until the sample achieved constant weight. A second open container containing a few mL of the volatile liquid, chosen in turn from acetonitrile, methanol, ethanol, acetone, ethoxyethane, dichloromethane, trichloromethane or tetrachloromethane, was then added and the vessel resealed. The weight change of the sample was then determined at ~0.25-1h intervals within 15 hours to obtain the vapour absorption profile.

**Table S1** Volatile compounds absorption profile of the porous compounds **A** and **B**

| Absorption capacities<br>(gram/per gram) | <b>A</b> | <b>B</b> |
|------------------------------------------|----------|----------|
| tetrachloromethane                       | 0.44     | 0.06     |
| trichloromethane                         | 0.30     | 0.30     |
| acetonitrile                             | 0.23     | 0.02     |
| dichloromethane                          | 0.22     | 0.34     |
| ethoxyethane                             | 0.20     | 0.12     |
| ethanol                                  | 0.14     | 0.30     |
| acetone                                  | 0.10     | 0.03     |
| methanol                                 | 0.06     | 0.16     |

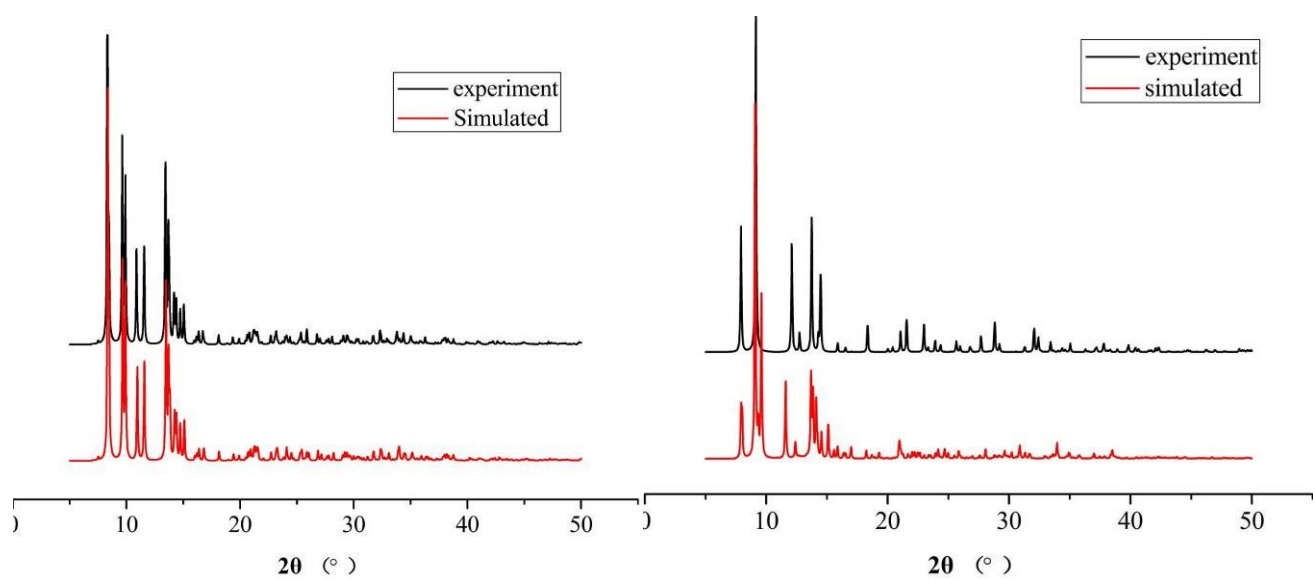

**Figure S1** Powder X-ray diffraction (PXRD) of **A** and **B**, respectively

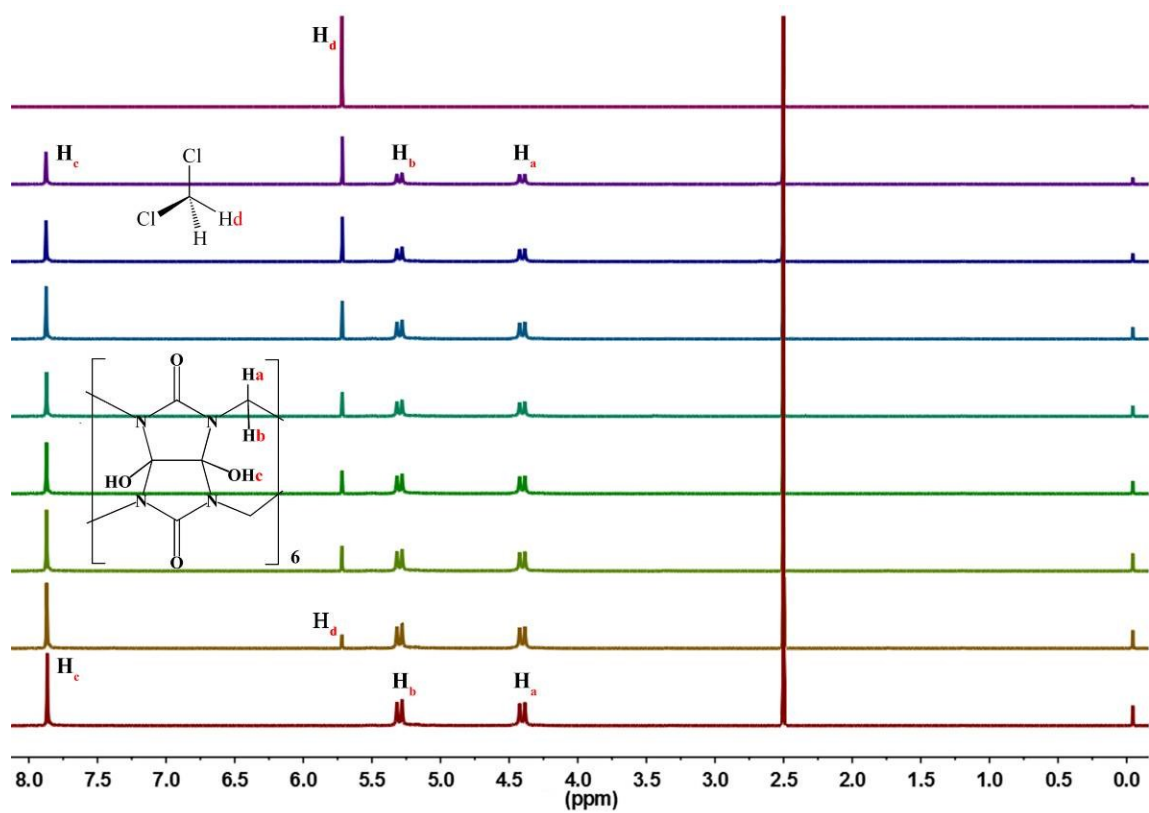

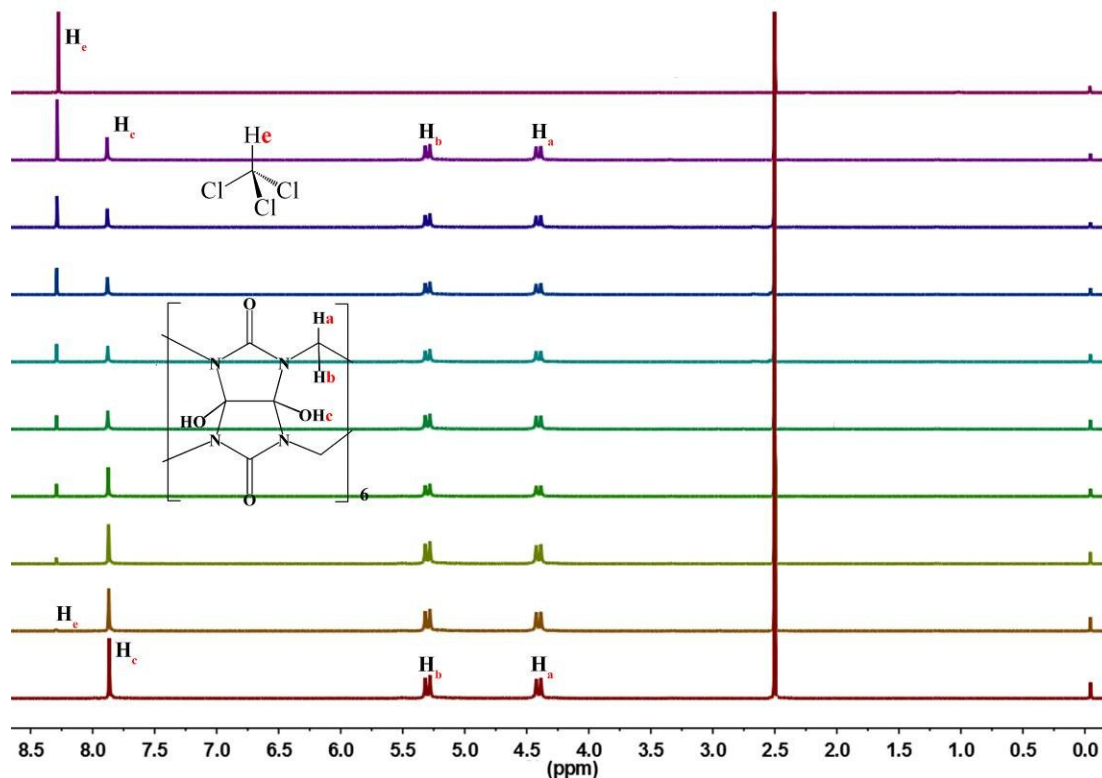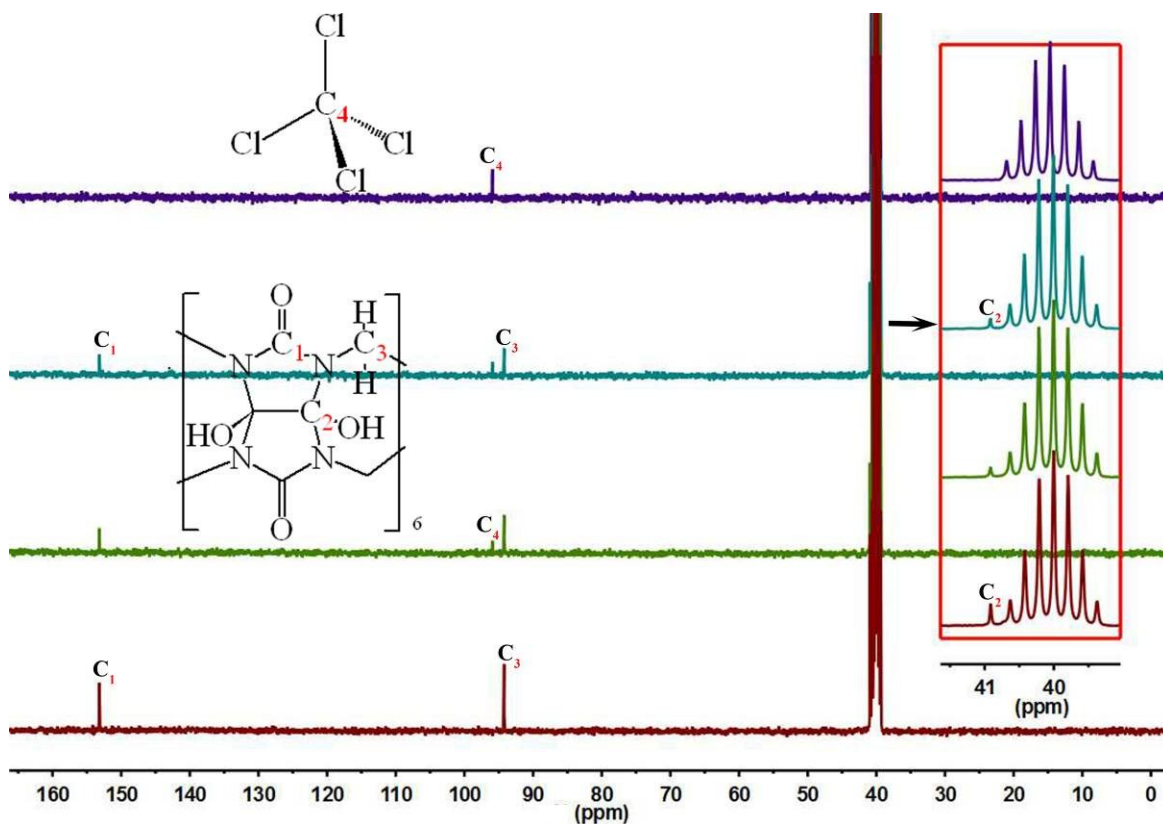

**Figure S2** Titration  $^1\text{H}$  NMR spectra of  $(\text{HO})_{12}\text{Q}[6]$  with increasing amount of (a) dichloromethane; (b) trichloromethane; (c) titration  $^{13}\text{C}$  NMR spectra of  $(\text{HO})_{12}\text{Q}[6]$  with increasing amount of tetrachloromethane in  $\text{DMSO-d}_6$  at  $20^\circ\text{C}$ .

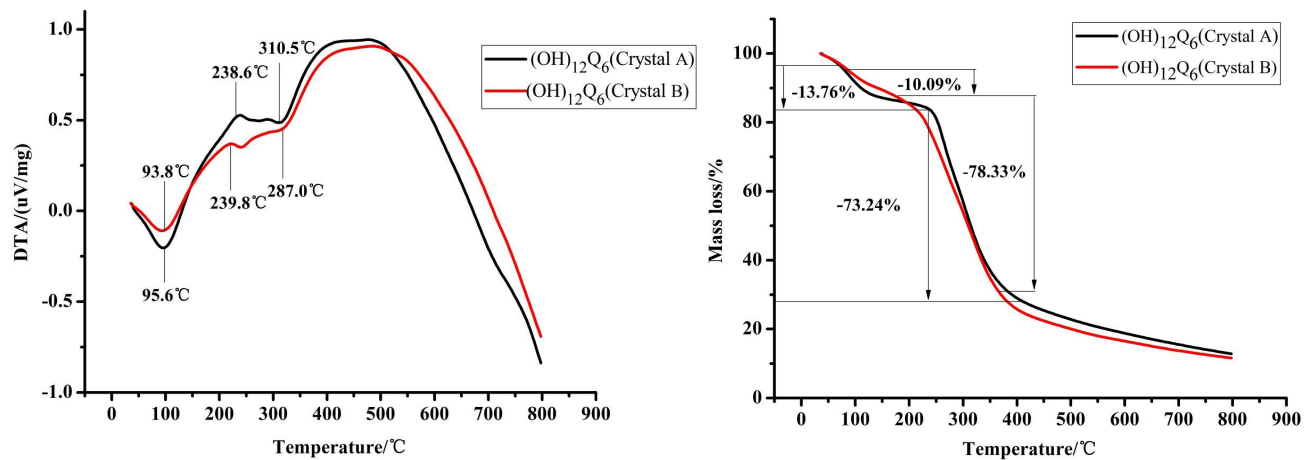

**Figure S3** DTA (left) and TG (right) curves of compounds **A**, **B** in  $N_2$  respectively.

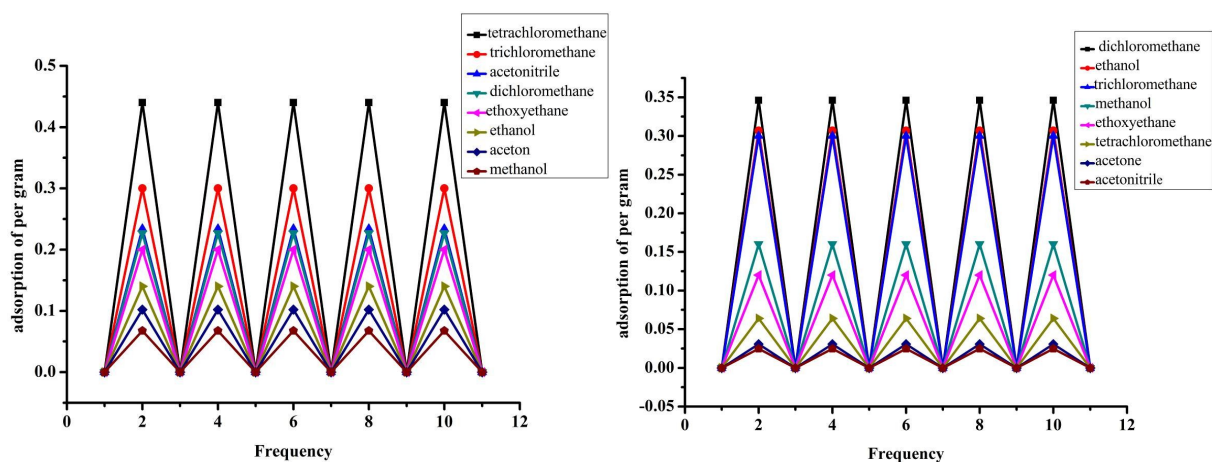

**Figure S4** lifetime experiments for the selected adsorbates on **A** and **B** in five cycles

**Table S2** Crystallographic data for compounds **A** and **B**

| Compounds                                                    | A                                                               | B                                                               |
|--------------------------------------------------------------|-----------------------------------------------------------------|-----------------------------------------------------------------|
| empirical formula                                            | C <sub>36</sub> H <sub>80</sub> N <sub>24</sub> O <sub>46</sub> | C <sub>36</sub> H <sub>86</sub> N <sub>24</sub> O <sub>49</sub> |
| formula weight                                               | 1585.24                                                         | 1639.29                                                         |
| crystal system                                               | triclinic                                                       | monoclinic                                                      |
| space group                                                  | <i>P</i> -1                                                     | <i>C</i> 2/ <i>c</i>                                            |
| <i>a</i> (Å)                                                 | 11.3453(13)                                                     | 15.359(12)                                                      |
| <i>b</i> (Å)                                                 | 12.5873(15)                                                     | 21.896(12)                                                      |
| <i>c</i> (Å)                                                 | 13.3419(16)                                                     | 18.644(12)                                                      |
| $\alpha$ (°)                                                 | 61.922(4)                                                       | 90.00                                                           |
| $\beta$ (°)                                                  | 83.098(4)                                                       | 100.105(12)                                                     |
| $\gamma$ (°)                                                 | 69.125(4)                                                       | 90.00                                                           |
| <i>V</i> (Å <sup>3</sup> )                                   | 1568.1(3)                                                       | 6172(7)                                                         |
| <i>Z</i>                                                     | 1                                                               | 4                                                               |
| <i>D</i> <sub>calcd</sub> ( g·cm <sup>-3</sup> )             | 1.641                                                           | 1.706                                                           |
| $\mu$ (MoK $\alpha$ )(mm <sup>-1</sup> )                     | 0.151                                                           | 0.157                                                           |
| T( K)                                                        | 223(2)                                                          | 223(2)                                                          |
| Unique reflns                                                | 5505                                                            | 5494                                                            |
| Obsd reflns                                                  | 4508                                                            | 3217                                                            |
| Params                                                       | 379                                                             | 381                                                             |
| <i>R</i> <sub>int</sub>                                      | 0.0365                                                          | 0.1298                                                          |
| <i>R</i> [ <i>I</i> > 2 $\sigma$ ( <i>I</i> )] <sup>a</sup>  | 0.0956                                                          | 0.0998                                                          |
| <i>wR</i> [ <i>I</i> > 2 $\sigma$ ( <i>I</i> )] <sup>b</sup> | 0.3087                                                          | 0.3802                                                          |
| <i>R</i> [all data] <sup>a</sup>                             | 0.1074                                                          | 0.1694                                                          |
| <i>wR</i> [all data] <sup>b</sup>                            | 0.3280                                                          | 0.4026                                                          |
| GOF on <i>F</i> <sup>2</sup>                                 | 1.479                                                           | 1.478                                                           |

<sup>a</sup> $R_1 = \sum ||F_o| - |F_c|| / \sum |F_o|$ . <sup>b</sup> $wR_2 = \sum w(|F_o|^2 - |F_c|^2) / \sum w(F_o)^2|^{1/2}$ , where  $w = 1/[^2(F_o^2) + (aP)^2 + bP]$ ;  $P = (F_o^2 + 2F_c^2)/3$ .
